# Supplementary material for: Prepublication data sharing
Source: Springer Nature journal article supplement (doi:10.1038/461168a), 2009-09-01
Supplement: 41586_2009_BF461168a_MOESM246_ESM.pdf [file 41586_2009_BF461168a_MOESM246_ESM.pdf]

Writing Group Members: Ewan Birney<sup>1</sup>, Thomas J. Hudson<sup>2,3</sup>, Eric D. Green<sup>4</sup>, Chris Gunter<sup>5</sup>, Sean Eddy<sup>6</sup>, Jane Rogers<sup>7</sup>, Jennifer R. Harris<sup>8</sup> and S. Dusko Ehrlich<sup>9</sup>.

Additional Authors:

Rolf Apweiler<sup>1</sup>, Christopher P. Austin<sup>10</sup>, Lisa Berglund<sup>11</sup>, Martin Bobrow<sup>12</sup>, Chas Bountra<sup>13</sup>, Anthony J. Brookes<sup>14</sup>, Anne Cambon-Thomsen<sup>15,16</sup>, Nigel P. Carter<sup>17</sup>, Rex L. Chisholm<sup>18,19</sup>, Jorge L. Contreras<sup>20,21</sup>, Robert M. Cooke<sup>22</sup>, William L. Crosby<sup>23</sup>, Ken Dewar<sup>24</sup>, Richard Durbin<sup>17</sup>, Stephanie O.M. Dyke<sup>17</sup>, Joseph R. Ecker<sup>25</sup>, Khaled El Emam<sup>26,27</sup>, Lars Feuk<sup>28</sup>, Stacey B. Gabriel<sup>29</sup>, John Gallacher<sup>30</sup>, William M. Gelbart<sup>31</sup>, Antoni Granell<sup>32</sup>, Francisco Guarner<sup>33</sup>, Tim Hubbard<sup>17</sup>, Scott A. Jackson<sup>34</sup>, Jennifer L. Jennings<sup>2</sup>, Yann Joly<sup>35</sup>, Steven M. Jones<sup>36</sup>, Jane Kaye<sup>37</sup>, Karen L. Kennedy<sup>17</sup>, Bartha Maria Knoppers<sup>35,38</sup>, Nikos C. Kyrpides<sup>39</sup>, William W. Lowrance<sup>40</sup>, Jingchu Luo<sup>41</sup>, John J. MacKay<sup>42</sup>, Luis Martín-Rivera<sup>43</sup>, W. Richard McCombie<sup>44</sup>, John D. McPherson<sup>2</sup>, Linda Miller<sup>45</sup>, Webb Miller<sup>46</sup>, Don Moerman<sup>47</sup>, Vincent Mooser<sup>48</sup>, Cynthia C. Morton<sup>49,50</sup>, James M. Ostell<sup>51</sup>, B.F. Francis Ouellette<sup>2</sup>, Julian Parkhill<sup>17</sup>, Parminder S. Raina<sup>52</sup>, Christopher Rawlings<sup>53</sup>, Steven E. Scherer<sup>54</sup>, Stephen W. Scherer<sup>55,56</sup>, Paul N. Schofield<sup>57</sup>, Christoph W. Sensen<sup>58</sup>, Victoria C. Stodden<sup>59</sup>, Michael R. Sussman<sup>60</sup>, Toshihiro Tanaka<sup>61</sup>, Janet Thornton<sup>1</sup>, Tatsuhiro Tsunoda<sup>61</sup>, David Valle<sup>62</sup>, Eero I. Vuorio<sup>63</sup>, Neil M. Walker<sup>64</sup>, Susan Wallace<sup>65</sup>, George Weinstock<sup>66,67</sup>, William B. Whitman<sup>68</sup>, Kim C. Worley<sup>54</sup>, Cathy Wu<sup>69,70</sup>, Jiayan Wu<sup>71</sup>, Jun Yu<sup>71</sup>.

1. EMBL-EBI, Wellcome Trust Genome Campus, Hinxton, Cambridge CB10 1SD, UK
2. Ontario Institute for Cancer Research, 101 College Street, Toronto, ON M5G 0A3, Canada
3. University of Toronto, Departments of Medical Biophysics and Molecular Genetics, Toronto, ON, Canada
4. National Human Genome Research Institute, US National Institutes of Health, 50 South Drive, Bethesda, MD 20892, USA
5. HudsonAlpha Institute for Biotechnology, 601 Genome Way, Huntsville, Alabama 35806, USA
6. Howard Hughes Medical Institute, Janelia Farm Research Campus, 19700 Helix Drive, Ashburn, VA 20147, USA
7. The Genome Analysis Centre, Norwich Research Park, Colney, Norwich, Norfolk NR4 7UH, UK
8. The Norwegian Institute of Public Health, Division of Epidemiology, PO Box 4404, Nydalen, N-0403, Oslo, Norway
9. French National Institute for Agricultural Research, Microbial Genetics Unit, 78350 Jouy en Josas, France
10. US National Institutes of Health, National Human Genome Research Institute, NIH Chemical Genomics Center, 9800 Medical Center Drive, Bethesda, MD 20892, USA
11. Royal Institute of Technology, School of Biotechnology, AlbaNova University Center, SE-106 91 Stockholm, Sweden
12. University of Cambridge, Cambridge Institute for Medical Research, Department of Medical Genetics, Addenbrooke's Hospital, Wellcome Trust/MRC Building, Cambridge CB2 0XY, UK
13. University of Oxford, Structural Genomics Consortium, Old Road Campus, Roosevelt Drive, Headington, Oxford OX3 7DQ, UK
14. The University of Leicester, University Road, Leicester LE1 7RH, UK
15. Inserm, U558, Epidemiology and Analyses in Public Health, Faculty of Medicine, 37 allées Jules Guesde, 31073 Toulouse Cedex 7, France
16. University of Toulouse, 15 rue des Lois, 31000 Toulouse Cedex 4, France
17. Wellcome Trust Sanger Institute, Wellcome Trust Genome Campus, Hinxton, Cambridge CB10 1SA, UK
18. Northwestern University, Center for Genetic Medicine, 303 East Superior Street, Lurie 7-123, Chicago, IL 60611, USA
19. Northwestern University, Feinberg School of Medicine, 303 East Chicago Avenue, Chicago, IL 60611, USA
20. Wilmer Cutler Pickering Hale and Dorr LLP, 1875 Pennsylvania Avenue, NW, Washington, DC 20006, USA
21. Washington University in St. Louis, School of Law, 1 Brookings Drive, St. Louis, MO 63130, USA
22. GlaxoSmithKline, Department of Science Environment Development, Gunnels Wood Road, Stevenage, Herts SG1 2NY, UK
23. University of Windsor, Department of Biological Science, 401 Sunset Avenue, Windsor, ON N9B 3P4, Canada
24. McGill University and Genome Quebec Innovation Centre, 740 Dr Penfield Avenue, Montreal, QC H3A 1A4, Canada
25. Salk Institute Genomic Analysis Laboratory, 10010 N. Torrey Pines Road, La Jolla, CA 92037, USA
26. Children's Hospital of Eastern Ontario Research Institute, 401 Smyth Road, Ottawa, ON K1H 8L1, Canada
27. University of Ottawa, Department of Pediatrics, 451 Smyth Road, Ottawa, ON K1H 8M5, Canada
28. Uppsala University, Department of Genetics and Pathology, Rudbeck Laboratory, 751 85 Uppsala, Sweden
29. Broad Institute, 320 Charles Street, Cambridge, MA 02141-2023, USA
30. Cardiff University, Department of Primary Care and Public Health, University Hospital of Wales, Neuadd Meirionnydd, Heath Park, Cardiff CF14 4YS, UK
31. Harvard University, Department of Molecular and Cellular Biology, 16 Divinity Avenue, Cambridge, MA 02138, USA
32. Universidad Politécnica de Valencia, Instituto de Biología Molecular y Celular de Plantas, Ciudad Politécnica de la Innovación, Edificio 8E, Ingeniero fausto Elio s/n, 46 011 Valencia, Spain
33. Vall d'Hebron University Hospital, Passeig Vall d'Hebron 119-129, 08035 Barcelona, Spain
34. Purdue University, Department of Agronomy, 915 W. State Street, Lilly Hall of Life Sciences, West Lafayette, IN 47907, USA
35. McGill University and Genome Quebec Innovation Centre, Centre of Genomics and Policy, 740 Dr Penfield Avenue, Montreal, QC H3A 1A4, Canada
36. British Columbia Cancer Agency, Canada's Michael Smith Genome Sciences Centre, 570 West 7th Avenue, Vancouver, BC V5Z 4S6, Canada
37. University of Oxford, Ethox Centre, Old Road Campus, Badenoch Building, Headington, Oxford OX3 7LF, UK
38. Public Population Project in Genomics, 3333 Queen-Mary Road, Suite 590, Montreal, QC H3V 1A2, Canada
39. U.S. Department of Energy Joint Genome Institute, 2800 Mitchell Drive, Walnut Creek, CA 94598, USA
40. Consultant in Health Research Policy and Ethics, 111 placette des Goelands, F-34280 La Grande Motte, France
41. Peking University, College of Life Sciences, Beijing 100871, China
42. Laval University, Center for Forest Research, 1030 avenue de la Médecine, Quebec, QC G1V 0A6, Canada
43. Genoma España, Calle Orense 69, 28020 Madrid, Spain
44. Cold Spring Harbor Laboratory, 1 Bungtown Road, Cold Spring Harbor, NY 11724, USA
45. Nature and the Nature journals, 75 Varick Street, Floor 9, New York, NY 10013-1917, USA

46. Penn State University, Departments of Biology and Computer Science and Engineering, 208 Mueller Lab, University Park, PA 16823, USA
47. University of British Columbia, Department of Zoology, 6270 University Boulevard, Vancouver, BC V6T 1Z4, Canada
48. GlaxoSmithKline, Genetics Division, 709 Swedeland Road, King of Prussia, PA 19406, USA
49. Brigham and Women's Hospital, Departments of Obstetrics, Gynecology and Reproductive Biology and Pathology, 77 Avenue Louis Pasteur, Boston, MA 02115, USA
50. Harvard Medical School, Departments of Obstetrics, Gynecology and Reproductive Biology and Pathology, 77 Avenue Louis Pasteur, Boston, MA 02115, USA
51. US National Institutes of Health, National Library of Medicine, National Center for Biotechnology Information, 8600 Rockville Pike, Bethesda, MD 20894, USA
52. McMaster University, Department of Clinical Epidemiology & Biostatistics, 1280 Main Street West, Hamilton, ON L8S 4L8, Canada
53. Rothamsted Research, Department of Biomathematics and Bioinformatics, Harpenden, Hertfordshire AL5 2JQ, UK
54. Baylor College of Medicine, Human Genome Sequencing Center and Department of Molecular and Human Genetics, 1 Baylor Plaza, Houston, TX 77030, USA
55. Hospital for Sick Children, The Centre for Applied Genomics, 101 College Street, Toronto, ON M5G 1L7, Canada
56. University of Toronto, Department of Molecular Genetics, Toronto, ON, Canada
57. University of Cambridge, Department of Physiology, Development and Neuroscience, Downing Street, Cambridge CB2 3EG, UK
58. University of Calgary, Faculty of Medicine, Department of Biochemistry and Molecular Biology, Sun Center of Excellence for Visual Genomics, 3330 Hospital Drive NW, Calgary, AB T2N 4N1, Canada
59. Yale Law School, New Haven, CT 06520, USA
60. University of Wisconsin-Madison, Department of Biochemistry, 2320 Biotechnology Center, 425 Henry Mall, Madison, WI 53706, USA
61. RIKEN Center for Genomic Medicine, 1-7-22 Suehiro-cho, Tsurumi-ku, Yokohama, Kanagawa 230-0045, Japan
62. Johns Hopkins University School of Medicine, Institute of Genetic Medicine, Baltimore, MD 21287, USA
63. University of Turku, FI-20014 Turku, Finland
64. University of Cambridge, Cambridge Institute for Medical Research, Juvenile Diabetes Research Foundation/Wellcome Trust Diabetes and Inflammation Laboratory, Addenbrooke's Hospital, Wellcome Trust/MRC Building, Cambridge, CB2 0XY, UK
65. University of Montreal, Centre de recherche en droit public, 3101 chemin de la Tour, Montreal, QC H3T 1J7, Canada
66. Washington University School of Medicine, Genome Center, 4444 Forest Park Avenue, St. Louis, MO 63108, USA
67. Washington University School of Medicine, Department of Genetics, St. Louis, MO 63110, USA
68. University of Georgia, Department of Microbiology, Athens, GA 30602, USA
69. University of Delaware, Center for Bioinformatics & Computational Biology, 15 Innovation Way, Newark, DE 19711, USA
70. Georgetown University Medical Center, 4000 Reservoir Road NW, Washington, DC 20007, USA
71. Beijing Institute of Genomics, Chinese Academy of Sciences, No.7 Beitucheng West Road, Chaoyang District, Beijing 100029, China

**Acknowledgements**

The authors wish to thank the following funding agencies for supporting the Toronto Data Release Workshop: Biotechnology and Biological Sciences Research Council, the European Commission, Genome Canada, the National Human Genome Research Institute, the National Science Foundation, and the Wellcome Trust. We are also grateful to Genny Cardin and the staff at Genome Canada for logistical assistance.
